# Supplementary material
Source: ML conference proceedings conference paper supplement (https://openaccess.thecvf.com/content/CVPR2021/html/Jeon_Mining_Better_Samples_CVPR_2021_paper.html)
Supplement: Supplementary file 2 [file Jeon_Mining_Better_Samples_CVPR_2021_supplemental.zip]

Archive with 2 entries (2 files):
- 05053-supp.pdf
- 05053-supp-video.mp4
